# Supplementary material for: ACROPOLIS: Munich Urban CO 2 Sensor Network
Source: Copernicus journal article supplement (doi:10.5194/egusphere-2025-4157), 2025-09-04
Supplement: Supplementary file [file egusphere-2025-4157-AC3-supplement.pdf]

# Response to Anonymous Referee #3 for EGUSPHERE-2025-4157 (ACROPOLIS: Munich Urban CO<sub>2</sub> Sensor Network)

Patrick Aigner<sup>1</sup>, Jia Chen<sup>1</sup>, Felix Böhm<sup>1</sup>, Mali Chariot<sup>2</sup>, Lukas Emmenegger<sup>3</sup>, Lars Frölich<sup>1</sup>, Stuart Grange<sup>3,4</sup>, Daniel Kühbacher<sup>1</sup>, Klaus Kürzinger<sup>1</sup>, Olivier Laurent<sup>2</sup>, Moritz Makowski<sup>1</sup>, Pascal Rubli<sup>3</sup>, Adrian Schmitt<sup>1</sup>, and Adrian Wenzel<sup>1</sup>

<sup>1</sup>Technical University of Munich (TUM), Munich, Germany

<sup>2</sup>Laboratoire des Science du Climat et de l'Environnement (LSCE/IPSL), Gif-sur-Yvette, France

<sup>3</sup>Swiss Federal Laboratories for Materials Science and Technology (Empa), Dübendorf, Switzerland

<sup>4</sup>University of Bern, Bern, Switzerland

**Correspondence:** Patrick Aigner (patrick.aigner@tum.de) and Jia Chen (jia.chen@tum.de)

## Anonymous Referee #3

### General Comment

*Summary. This manuscript presents the setup and testing of a network of 20 mid-cost CO<sub>2</sub> concentration sensors with the aim to set up an urban network of CO<sub>2</sub> concentration observations to identify urban gradients in CO<sub>2</sub>. The manuscript fits the scope of the journal. The study is impressive and one of the first that illustrates the details in setting up, maintaining and interpreting such urban CO<sub>2</sub> network. So I recommend to accept this manuscript after some revisions. Recommendation: Minor revisions are needed*

### Response:

We sincerely thank the reviewer for the positive and detailed feedback, as well as for the time and effort dedicated to reviewing our manuscript. We address the individual comments point by point below.

### Major Remarks

(1) *The paper misses in my opinion the opportunity to explain why such a CO<sub>2</sub> concentration network is needed. Most studies deal with CO<sub>2</sub> fluxes, rather than concentrations in order to study the carbon budget of sources and sinks. Here you add a network of CO<sub>2</sub> concentration observations, but the study does not say much about how this complements or support the CO<sub>2</sub> flux budget estimations, or how it can help to study CO<sub>2</sub> advection estimates (since you generate spatial gradients that are unique).*

### Response:

We thank the referee for this thoughtful comment. We agree that the manuscript should better explain the broader purpose of an urban CO<sub>2</sub> concentration network. The primary focus of this paper is the development, deployment, and evaluation of the ACROPOLIS measurement network. Its role within ICOS Cities is to provide high-quality, spatially distributed CO<sub>2</sub>

concentration data that can serve as a key observational input for urban inverse-modelling systems, in combination with detailed urban emission inventories.

The inverse modeling in ICOS Cities is developed by dedicated partner teams. Several results based on these efforts are already available (Brunner et al. (2025), Ponomarev et al. (2025)), while additional studies will be published soon. This division of work reflects the structure of the project, in which measurement, inventory development, and modelling are coordinated but addressed in separate contributions.

We have updated the Introduction and refined the Conclusion to clarify the intended role of ACROPOLIS within this framework and to emphasise that the present study focuses on establishing the measurement network and its data quality, while the inverse-modelling applications are addressed in companion work by colleagues.

**Addition to the manuscript:** (Introduction)

Urban CO<sub>2</sub> concentration networks such as ACROPOLIS provide observational constraints that are essential inputs to urban inverse-modelling systems when combined with detailed emission inventories (Lauvaux et al. (2020), Nalini et al. (2022)). These concentration measurements capture the integrated influence of local fluxes and atmospheric transport, enabling inverse models to infer spatial emission patterns and reduce uncertainties in city-scale carbon budgets. Within the ICOS Cities project, the modelling framework and the development of urban emission inventories are carried out by dedicated partner teams. Several results for Paris and Zurich are already available (Brunner et al. (2025), Ponomarev et al. (2025)), and additional studies will be published soon.

**Update of the manuscript:** (Conclusion)

Looking ahead, the ACROPOLIS network is expected to provide an important observational component within the broader ICOS Cities framework, and it may also support other projects making use of the open-source data products. A major upcoming step in the project is the integration of these CO<sub>2</sub> concentration observations into the urban modelling frameworks developed by partner teams. As these efforts advance, the network presented here may contribute to improved constraints on urban carbon budgets.

(2) *I think the manuscript can do more to justify the sensor network is more or less free from local influences. I fully agree with the strategy to find measurement locations like schools and hospitals and independent buildings to limit local influences, but at the same time the paper does not say/claim/justify one succeeded in doing so (which is not an easy task, I understand). This could be made more clear.*

**Response:**

We thank the referee for raising this important point. In dense urban environments, some degree of local contamination is unavoidable, and we now make this more explicit in the manuscript. Our strategy aims to minimise such influences by selecting the best available locations within the practical constraints of available spaces. Nevertheless, additional local effects can occur and must be addressed during post-processing.

To support this, all stations are equipped with co-located wind measurements, and our pipeline applies a Hampel-based spike detection scheme to identify local contamination. Across the network, the fraction of flagged 1-min values is generally low (median < 1 %), while stations with known nearby sources show higher fractions. We added a table summarising these outlier rates to make the prevalence of such events more transparent. Persistent or systematic contamination is further treated in the yearly release Level-2 datasets, where episodes attributable to identifiable local sources are manually flagged. We have updated the manuscript to clarify these limitations and to better describe how local influences need to be handled within the data workflow.

50

**Update of the manuscript:** (Section 2.3.4)

Although careful site selection reduces the influence of nearby emission sources, some level of local contamination is unavoidable in dense urban environments. The Hampel filtering therefore provides a first automated diagnostic of short-lived disturbances. Following this step, the Level 2 (L2) data set is produced through manual operator validation, during which persistent or recurrent anomalies attributable to identifiable local sources are flagged. The resulting one-minute and hourly averaged L2 data supplement the automated filtering L1 data. Both L1 and L2 datasets are uploaded to the ICOS Cities Portal, with L1 available continuously and L2 released once per year.

**Addition to the manuscript:** (New Section 2.5.2)

Some degree of local influence is unavoidable in dense urban environments, even with careful site selection. The availability of suitable installation locations is limited, and the deployed stations therefore represent the best feasible choices within these constraints. Remaining local effects are handled in the post-processing workflow described in Section 2.3.4, which includes automated Hampel filtering and manual validation in the Level 2 data products. The percentage of one-minute values flagged by the Hampel filter varies between sites and provides a first indication of short-lived local disturbances. An overview of the percentage of flagged data for each site can be found in Table A1 in Appendix H.

**Addition to the manuscript:** (Table A1, Appendix H)

|                   |         |      |      |      |         |      |      |        |      |        |
|-------------------|---------|------|------|------|---------|------|------|--------|------|--------|
| <b>Station</b>    | BALR    | MAIR | NPLR | HARR | BOGR    | DLRR | RDIR | BLUT85 | TAUR | BLUT48 |
| <b>Spikes (%)</b> | 2.43    | 2.31 | 1.30 | 1.07 | 1.04    | 0.80 | 0.74 | 0.70   | 0.68 | 0.63   |
| <b>Station</b>    | TUMR v1 | SENR | FELR | GROR | TUMR v2 | FINR | SCHR | SWMR   | PASR |        |
| <b>Spikes (%)</b> | 0.64    | 0.64 | 0.63 | 0.65 | 0.60    | 0.53 | 0.52 | 0.50   | 0.43 |        |

**Minor Remarks**

55 (1) (Ln 209) *What about extreme high RH? Does the system still work at RH between 95 and 100% or in fog and rainy conditions? These are usually troublesome. Have data been removed, and if so, how many?*

**Response:**

We thank the referee for raising this important point. The outdoor enclosure is heated, which keeps the internal relative humidity well below critical levels even during periods of high ambient humidity. Across all sites, the internal humidity rarely exceeds 60 %, and values above this threshold are extremely uncommon. To illustrate this, we added a histogram of the internal

60

relative humidity to the Supplement (Fig. 1). No data were removed based on humidity.

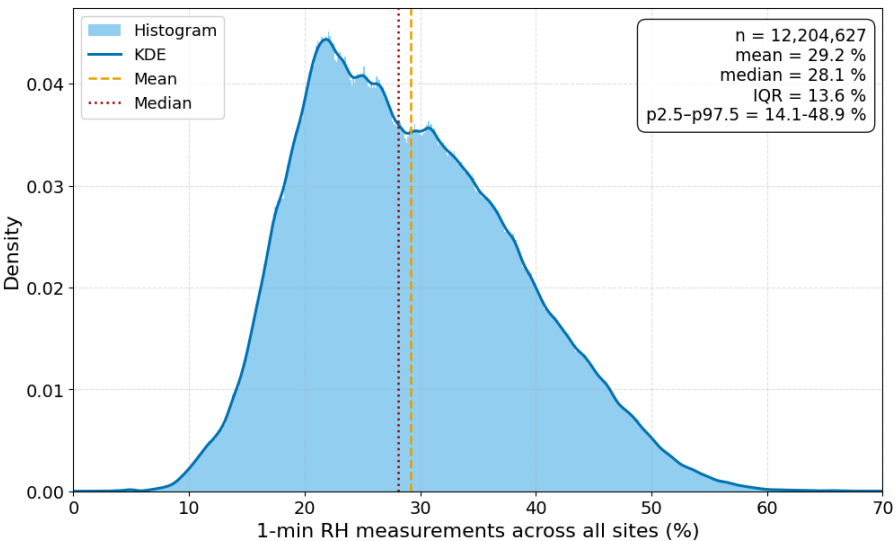

**Figure 1.** Distribution of over 12 million relative in-flow humidity measurements across all urban ACROPOLIS sites in Munich for data from January 2024 until October 2025. The vertical dashed lines indicate the mean and median. Interquantile range (IQR), kernel density estimate (KDE), and 2.5% and 97.5% percentiles are shown.

(2) **(Appendix A)** please swap the x axis and the y axis, since the Picarro is your reference, and should be thus on the x axis (independent variable) and the system is your test case (dependent variable).

65 **Response:**

We thank the referee for this helpful suggestion. We have updated the figure in Appendix A so that the Picarro reference measurements are now placed on the x-axis and the system observations on the y-axis, following standard conventions for dependent and independent variables.

70 (3) **(Figure 6)** in the x axis MAE and RMSE need a unit. The caption should be elaborated since it is not clear what is the meaning of a dot (i.e. is one dot one sensor?), and it is not clear how the RMSE and MAE are calculated. I.e. is it the RMSE over the all hourly values, daily values, daytime values... Some more guidance in the caption is welcome.

**Response:**

We thank the referee for these helpful suggestions. Regarding the unit, we respectfully note that the y-axis already specifies ppm, which applies to both RMSE and MAE. To improve clarity, we updated the caption to explicitly describe how RMSE and MAE are computed and to clarify that each point corresponds to one ACROPOLIS system.

75

**Update of the manuscript:** (Figure 6, Caption)

Root mean square error (RMSE) and mean absolute error (MAE) of each GMP343 sensor compared to a Picarro G2301 reference instrument. For both RMSE and MAE, the plot contains 20 points corresponding to the 20 ACROPOLIS systems. All error metrics are calculated from hourly mean concentrations and reported in ppm.

(4) *I would like to see some more justification for the chosen error metric (e.g. based on*

80 *<https://gmd.copernicus.org/articles/15/5481/2022/> and underlying works). RMSE and MAE are likely common practise, but RMSE is not an unbiased error estimator (<https://www.sciencedirect.com/science/article/abs/pii/S0020025521011567>), which may mean your results are better than you present now in the manuscript.*

**Response:**

We thank the reviewer for this constructive comment. Following Hodson (2022), RMSE and MAE should not be treated as  
85 interchangeable metrics, as they reflect different assumptions about the underlying error distribution. RMSE is most suited for approximately Gaussian errors, whereas MAE provides a more robust estimate when the distribution shows heavier tails or a sharper central peak.

We calculated RMSE/MAE ratios following the recommendation in Karunasingha (2022) and added the results to Table 2. The average ratio across all sensors is 1.24, which is close to the theoretical value for Gaussian errors. Individual sensors span  
90 values from 1.11 to 1.38, indicating that some sensors deviate from normality. Presenting both RMSE and MAE therefore gives a more complete description of sensor performance at the individual-sensor level.

To further characterise the error structure, we plotted the NDIR–Picarro residuals for the 2024 side-by-side comparison and for both systems in the 2025 evaluation (Fig. 2). These distributions confirm that specific sensors can exhibit Laplace-like residuals with a sharp peak and heavier tails, while in this example the Generation 2 system tends toward more Gaussian shape.

95 While RMSE and MAE are standard practice, RMSE remains the primary metric used throughout this study because it captures occasional larger deviations that can arise from environmental sensitivity and therefore reflects the upper bound of performance relevant for many applications. MAE is reported alongside RMSE to quantify the typical magnitude of errors and to characterise sensors with non-Gaussian residuals more robustly. Presenting both metrics improves transparency and allows direct comparison with studies that rely on either measure.

**Update of the manuscript:** (Table 2)

100 We added an addition column showing the RMSE/MAE ratio for each sensor to give an indication on the individual error distribution.

(5) **(Table 2, header)** *Mean bias, MAE and RMSE should have a unit*

**Response:**

We thank the referee for pointing this out. The table header has been updated to include the units for mean bias, MAE, and RMSE.

105

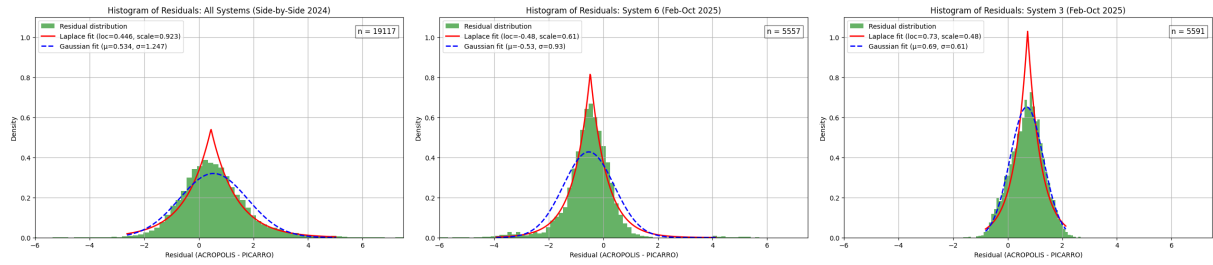

**Figure 2.** The figure shows the error distribution for all systems in the 2024 side-by-side campaign and for both system 3 (Generation 2) & system 6 (Generation 1) in the 2025 side-by-side campaign. We fit a normal distribution (blue line) and a Laplace distribution (red line) to the residuals (ACROPOLIS - Picarro) to help illustrate the different error distributions.

(6) **(Table 2)** *Reword Mean bias to bias, since bias is by definition an mean (as long as you do not average over all systems - which you do not do here).*

**Response:**

We thank the referee for this helpful suggestion. We have updated the table header by replacing "Mean bias" with "Bias".

110

(7) **(Figure 7)** *caption: reword “sensor temperature” to “hourly mean sensor temperature”.*

**Response:**

We thank the referee for the helpful suggestion. We have updated the caption to state “hourly mean sensor temperature” for improved clarity.

115

(8) **(Figure 7)** *revise y axis label. The graph now suggests the temperature measurement is accurate at 0.01 K, which is not the case. In your wording in ln 371, you also use only 1 decimal.*

**Response:**

We thank the referee for this helpful remark. We adjusted the y-axis formatting to one decimal so that it matches the level of precision discussed in the manuscript.

120

(9) **(Ln 377)** *significant improvement. Please add the results to a statistical test that confirms this statement.*

**Response:**

We thank the referee for pointing this out. We revised the wording to “clear improvement” to avoid implying statistical significance.

125

**Update of the manuscript:** (Line 395–399)

Sensor 3 in the second generation system performed with an RMSE of 0.60 ppm, an MAE of 0.49 ppm, and a standard deviation of 0.52 ppm, indicating a clear improvement in precision compared to its performance in the first-generation system (RMSE 0.91 ppm, MAE 0.68 ppm, standard deviation 0.91 ppm).

(10) **(Figure 10, caption)** *Please add the height at which the wind speed was measured.*

**Response:**

130 We thank the referee for the helpful suggestion. We have updated the caption of Figure 10 to include the height at which the wind speed was measured (15 m AGL).

(11) **(Figure 11, caption)** *reword to “Time series of observed CO<sub>2</sub> concentrations. . . .”*

**Response:**

135 We thank the referee for the suggestion and have updated the caption accordingly.

(12) **(Figure 12)** *profiles-> evolution. Profile is more reserved for vertical profiles.*

**Response:**

140 We thank the referee for the suggestion and have updated the caption accordingly.

(13) **(Ln 467-469)** *can be removed, since a) it is 3 short-sentences paragraph (too short), but mostly it reads as a figure caption, so should belong to the caption of fig 12 and not in the main text.*

**Response:**

145 We thank the referee for this helpful comment. We removed the three caption-like sentences from the main text and incorporated the relevant information into the end of Section 3.7.1.

**Update of the manuscript:** (Line 497–499)

GROR exhibits the lowest daytime concentrations across all seasons, reflecting its upwind position and correspondingly reduced exposure to urban emissions from Munich.

(14) **(Ln 471)** *This reflects enhanced photosynthetic uptake and higher boundary-layer heights. This statement is not confirmed with additional measurements. Are these available? I would say the concentrations are first of all lower because lower emissions in spring and summer than in winter. So a car traffic count or emission databases could support these.*

**Response:**

We thank the reviewer for this helpful comment. We agree that lower emissions in spring and summer are a primary driver of the observed seasonal decrease in CO<sub>2</sub> concentrations. We therefore revised the manuscript wording to clarify that our discussion of photosynthetic uptake and boundary-layer dynamics represents an interpretation rather than a conclusion supported

155 by additional measurements. At present, we do not include direct emission or traffic activity datasets in this analysis, but we acknowledge the reviewer's point and have adjusted the text to avoid implying observational confirmation.

**Update of the manuscript:** (Section 3.7.1)

We believe that the lower CO<sub>2</sub> levels during this period are primarily driven by reduced emissions, and that enhanced photosynthetic uptake together with higher boundary-layer heights further contribute to the observed seasonal decrease.

160 (15) **(Fig 13, caption)** *The results reveal distinct seasonal and spatial patterns in diurnal CO2 variability. This sentence should be removed, it is interpretation of the figure and thus needs to be in the main text.*

**Response:**

We thank the referee for pointing this out. We have removed the interpretative sentence from the caption as suggested.

165 (16) **(Fig 13, caption)** *"The diurnal variation is defined as the daily maximum minus minimum CO2 concentration." Do you mean "The diurnal variation is defined as the daily maximum minus minimum hourly CO2 concentration." ?*

**Response:**

We thank the referee for the clarification. Yes, the definition refers to hourly concentrations. We have updated the caption accordingly.

**Update of the manuscript:** (Figure 13, caption)

170 Diurnal variation is defined as the daily maximum minus the minimum of the hourly mean CO<sub>2</sub> concentration.

(17) **(Fig 13: y axis)** *the label says: Mean hourly diurnal cycle of CO2 variation. This is of course impossible (measuring an hourly diurnal cycle). I suggest to change to "Mean diurnal cycle of CO2 concentration (ppm) based on hourly mean observations"*

**Response:**

175 We thank the referee for the helpful remark. We have updated the y-axis label to "Mean diurnal CO<sub>2</sub> variation (max-min, ppm)", which accurately reflects the definition used (daily maximum minus minimum of the hourly mean concentrations) and avoids the ambiguity noted in the original wording.

180 (18) **(Figure 13)** *The figure's content is hyper-interesting and intriguing (and nicely plotted). But I was wondering whether an uncertainty estimate can be added to each (or a representative) label. E.g. for the urban station on the most left in the graph, the max diff between summer and winter is order 20 ppm. But if the error bar is 30 ppm (which I do not expect), then the differences between seasons are virtual. So if the error estimates are small, better to add them to show you have measured significantly different CO2 diurnal cycles between seasons. In fact you do in Fig 14!*

**Response:**



185 We sincerely thank the referee for the encouraging feedback on the figure and for raising this important point. As suggested,  
we now provide uncertainty estimates to clarify the robustness of the seasonal differences in diurnal  $CO_2$  variation. Specifically,  
we added 95 % confidence intervals derived from bootstrap resampling of the hourly mean concentrations. These intervals  
demonstrate that the observed seasonal contrasts are well-resolved and not an artefact of sampling variability. The figure  
caption has been updated accordingly.

190

**Addition to the manuscript:** (Figure 13, caption)

Vertical bars indicate the 95 % confidence intervals derived from bootstrap resampling.

(19) **(Section 3.7.3)** *More justification is needed for the definition of the afternoon hours (12:00 - 18:00 local time). I do agree  
with your strategy to ignore nocturnal accumulation. However, in Munchen in mid winter the sunset is at 16:22 CET, which  
means you will have about 2 h of stratified atmosphere in your sample. Please explain why 10:00-16:00 local time, was not  
chosen as study period. Or whether that would have given other conclusions.*

195

**Response:**

We thank the referee for this thoughtful comment and agree that the afternoon period should account for the early sunset  
during mid-winter. We therefore adjusted the analysis window to 10:00–16:00 local time. This modification does not affect the  
overall interpretation or the seasonal contrasts discussed in this section. The manuscript has been revised accordingly.

200

**Additional Changes:**

- We updated Figures 12–14 with the most recent data (up to 20 November) and updated the manuscript accordingly. The  
overall patterns remain unchanged, although some values have shifted slightly due to the extended data period.

- We updated Appendix E to include available data covering all summer months. Patterns are as before, with more data to  
support the observed trends.

205

## References

- Brunner, D., Suter, I., Bernet, L., Constantin, L., Grange, S. K., Rubli, P., Li, J., Chen, J., Bigi, A., and Emmenegger, L.: Building-resolving simulations of anthropogenic and biospheric CO<sub>2</sub> in the city of Zurich with GRAMM/GRAL, *Atmospheric Chemistry and Physics*, 25, 14 387–14 410, <https://doi.org/10.5194/acp-25-14387-2025>, 2025.
- 210 Karunasingha, D. S. K.: Root mean square error or mean absolute error? Use their ratio as well, *Information Sciences*, 585, 609–629, <https://doi.org/10.1016/j.ins.2021.11.036>, 2022.
- Lauvaux, T., Gurney, K. R., Miles, N. L., Davis, K. J., Richardson, S. J., Deng, A., Nathan, B. J., Oda, T., Wang, J. A., Hutyra, L., and Turnbull, J.: Policy-Relevant Assessment of Urban CO<sub>2</sub> Emissions, *Environmental Science & Technology*, 54, 10 237–10 245, <https://doi.org/10.1021/acs.est.0c00343>, pMID: 32806908, 2020.
- 215 Nalini, K., Lauvaux, T., Abdallah, C., Lian, J., Ciais, P., Utard, H., Laurent, O., and Ramonet, M.: High-Resolution Lagrangian Inverse Modeling of CO<sub>2</sub> Emissions Over the Paris Region During the First 2020 Lockdown Period, *Journal of Geophysical Research: Atmospheres*, 127, <https://doi.org/10.1029/2021JD036032>, 2022.
- Ponomarev, N., Steiner, M., Koene, E., Rubli, P., Grange, S., Constantin, L., Ramonet, M., David, L., Emmenegger, L., and Brunner, D.: Estimation of CO<sub>2</sub> fluxes in the cities of Zurich and Paris using the ICON-ART CTDAS inverse modelling framework, *EGUsphere*, 2025, 220 1–35, <https://doi.org/10.5194/egusphere-2025-3668>, 2025.
